# Supplementary material
Source: PubMed Central journal article supplement (PMC6928584)

**Figure S1. Brain MRI at diagnosis of pulmonary cryptococcosis**

Axial T1-weighted contrast-enhanced sequence that shows punctate enhancing cerebellar lesion.

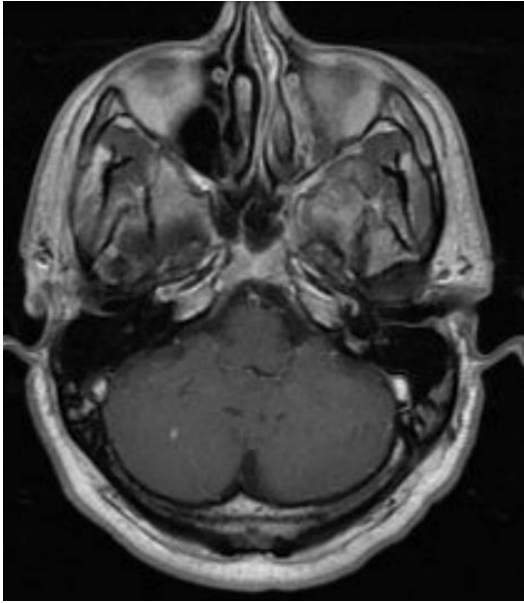

**Figure S2. Brain MRI 3 months after discontinuing fingolimod, initiating glatiramer acetate, and reporting clinical relapse in interim**

New T2-weighted/FLAIR non-enhancing brainstem lesion.

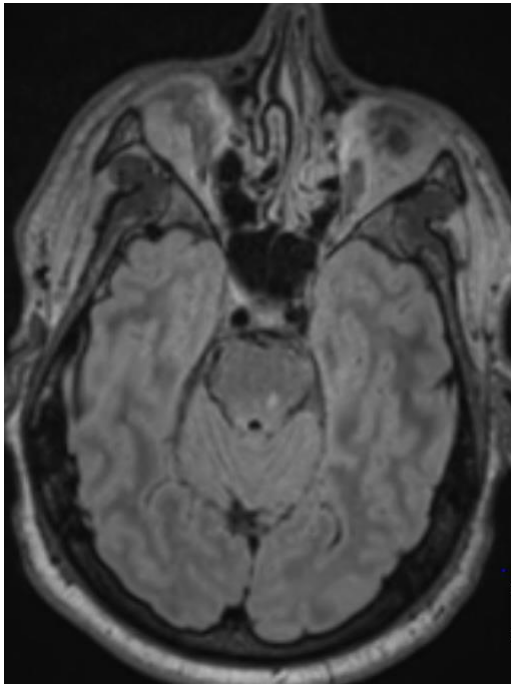

Supplement: i1537-2073-21-6-275_s01.pdf [file i1537-2073-21-6-275_s01.pdf]
